# Supplementary material
Source: Springer Nature journal article supplement (https://www.springerprofessional.de/resource/supplementary/13638_2014_895_MOESM2_ESM.pdf/11899152)
Supplement: MOESM2 [file 11899152]

```
if (an ABM is received) {  
    if (currenttime-lastABM <  $T_{period}$  ) ABM-MS;  
    else {  
        lastABM=current time;  
        if (selected to be the relay in the ABM) ABM-BD;  
        else if (closest to a VCP) {  
            measure the results and form a BM;  
            ABM-TS;}  
        else ABM-RV;  
    }  
}  
if (currenttime- lastABM >  $\Delta T$  ) MS-TO;  
if (currenttime-lastABM >  $2 T_{period}$  ) ABM-TO;  
if (currenttime-lastABM >  $T_{period}$  ) ABM-Beat;
```
